# Supplementary material for: Development of an Infectious Cell Culture System for Hepatitis C Virus Genotype 6a Clinical Isolate Using a Novel Strategy and Its Sensitivity to Direct-Acting Antivirals
Source: PubMed Central journal article supplement (PMC6288186; doi:10.3389/fmicb.2018.02950), 2018-12-04
Supplement: Presentation_1.pdf [file Presentation_1.pdf]

# **Development of an infectious cell culture system for hepatitis C virus genotype 6a clinical isolate using a novel strategy and its sensitivity to direct-acting antivirals**

Running title: **HCV genotype 6a infectious clone**

Mingxiao Chen<sup>1,2</sup>, Fuxiang Zheng<sup>1,2</sup>, Guosheng Yuan<sup>3</sup>, Xiaobing Duan<sup>1,2</sup>, Liang Rong<sup>1,2</sup>, Junwei Liu<sup>3</sup>, Shengjun Feng<sup>1,2</sup>, Ziting Wang<sup>1,2</sup>, Min Wang<sup>4</sup>, Yetong Feng<sup>1,2</sup>, Qing Zhou<sup>1,2</sup>, Jinqian Li<sup>1,2</sup>, Kai Deng<sup>1,2</sup>, Chunna Li<sup>5</sup>, Jinyu Xia<sup>5</sup>, Guirong Rao<sup>6</sup>, Yuanping Zhou<sup>3</sup>, Yongshui Fu<sup>4</sup> and Yi-Ping Li<sup>1,5\*</sup>

<sup>1</sup>Institute of Human Virology and Zhongshan School of Medicine, Sun Yat-sen University, Guangzhou, China; <sup>2</sup> Key Laboratory of Tropical Disease Control of Ministry of Education, Sun Yat-sen University, Guangzhou, China; <sup>3</sup> Department of Infectious Diseases, Nanfang Hospital, Southern Medical University, Guangzhou, China; <sup>4</sup>Guangzhou Blood Center, Guangzhou, China; <sup>5</sup>Program of Pathobiology, The Fifth Affiliated Hospital and Zhongshan School of Medicine, Sun Yat-sen University, Guangdong, China; <sup>6</sup>Key Laboratory of Liver Disease, Center of Infectious Diseases, PLA 458 Hospital, Guangzhou, China.

\*Correspondence author

E-mail: [lyiping@mail.sysu.edu.cn](mailto:lyiping@mail.sysu.edu.cn) (Y.-P.L.)

## Supplemental Materials

**Supplementary Table 1. The primers used for RT-PCRs for CH6a genome from the patient serum and the cultured cells.**

| Primer                               | Sequence (5'-3')          | Use of the primer                 |
|--------------------------------------|---------------------------|-----------------------------------|
| <b>For patient serum</b>             |                           |                                   |
| 6a-F59                               | TCCCCTGTGAGGAACTACTGT     | PCR fragment 1                    |
| 6a-R3590                             | GCCCCATGATAAACAGTCCACA    | PCR fragment 1                    |
| 6a-F3066                             | GCCCCTCTATACATCTTGCAG     | PCR fragment 2                    |
| 6a-R5893                             | AGCACATCAACCAACACCCT      | PCR fragment 2                    |
| 6a-F5511                             | CTAGGCACATCCCCTACCTC      | PCR fragment 3                    |
| 6a-R7943                             | TAGCATGGCTTCTAACGTCT      | PCR fragment 3                    |
| 6a-F7603                             | TCAGGTTCTTGGTCCACTGTGAGCG | PCR fragment 4 (NS5B)             |
| 6a-R9404                             | TGTTGCTAGGCGCGCTCG        | PCR fragment 4 (NS5B)             |
| 6a-F8981                             | GACATCTACGGAGTGACCTA      | 3'UTR                             |
| 3UTR- R9571                          | CGGACCTTTCACAGCTAGC       | 3'UTR                             |
| 6a-R9413                             | AAAGGAACGATGGAGTGTGCTAG   | ORF RT                            |
| 3UTR-R9619                           | ATGATCTGCAGAGAGACCAGT     | 3'UTR RT                          |
| <b>For cultured virus</b>            |                           |                                   |
| <b>C-NS2 virus</b>                   |                           |                                   |
| JF40                                 | CGACACTCCGCCATGAATCACT    | Outer primer of nested PCR        |
| JF62                                 | CCCCTGTGAGGAACTACTGTCT    | Inner primer of nested PCR        |
| JR3790                               | AATGCTCCCCGCTTGTCCCCY     | Inner primer of nested PCR        |
| JR3819                               | TCAAGGTCGAAATGGGTCTC      | Outer primer of nested PCR        |
| <b>C-5A/ORF/FL virus<sup>a</sup></b> |                           |                                   |
| JF40                                 | CGACACTCCGCCATGAATCACT    | PCR fragment 1 (outer primer)     |
| JF62                                 | CCCCTGTGAGGAACTACTGTCT    | PCR fragment 1 (inner primer)     |
| 6a-R5028                             | TCAAGCCAGTAAACACGCCTTCCC  | PCR fragment 1 (inner primer)     |
| 6a-R5165                             | TGAGACACTTCCACATCGTATCCCA | PCR fragment 1 (outer primer)     |
| 6a-F4619                             | CCGTCGCATTCTACAGAGGTGTCCG | PCR fragment 2 (outer primer)     |
| 6a-F4819                             | CGGTATCACGGAGCCAACGACGA   | PCR fragment 2 (inner primer)     |
| JR8178                               | AGGAAGCTCCCATTACCGCCTGA   | PCR fragment 2 (inner primer)     |
| JR8511                               | CCGCTAGGGCTTTCACATAGCAT   | PCR fragment 2 (outer primer)     |
| JR9398                               | GTACCTAGTGTGTGCCGCTCTA    | ORF PCR fragment 2 (inner primer) |
| JR9402                               | GTGTACCTAGTGTGTGCCGC      | ORF PCR fragment 2 (outer primer) |
| JR9405                               | CTATGGAGTGTACCTAGTGTGTGC  | RT                                |

<sup>a</sup>primers used for amplification of full-length CH6a virus are the same as those used for patient serum.

**Supplementary Table 2. Different genome organizations of 5'UTR-NS5A, Core-NS5A, or other recombinants with less CH6a sequence tested in this study.**

| CH6a recombinant               | Mutations                                                                                                                          | Transfections (day)  | Results                                        |
|--------------------------------|------------------------------------------------------------------------------------------------------------------------------------|----------------------|------------------------------------------------|
| <b>Core-NS5A</b>               |                                                                                                                                    |                      |                                                |
| C-5A_WT                        | None                                                                                                                               | 3 transfections (28) | Negative                                       |
| C-5A_LS                        | F1469L/A1677S (LS mutations)                                                                                                       | 3 transfections (28) | Negative                                       |
| C-5A_7m                        | K1303R/F1469L/V1555L/A1677S/K1696R/I1720F/L1795M                                                                                   | 3 transfections (42) | Positive, 1-2% in the first week, no spread    |
| C-5A_9m/G                      | K1303R/F1469L/V1555L/A1677S/K1696R/I1720F/L1795M/S2209I/S2223P/D2987G                                                              | 3 transfections (28) | Positive, $\leq$ ~1%, no spread                |
| C-5A_7m/G                      | K1303R/F1469L/V1555L/A1677S/K1696R/I1720F/L1795M/D2987G                                                                            | 3 transfections (35) | 1-2% in the first week, no better than 5'UTR-3 |
| C-5A_8m                        | K1303R/F1469L/V1555L/V1668A/A1677S/K1696R/I1720F/L1795M                                                                            | 3 transfections (28) | Positive, $\leq$ ~1%, no spread                |
| C-5A_10m/G                     | K1303R/F1469L/V1555L/V1668A/A1677S/K1696R/I1720F/L1795M/S2209I/S2223P/D2987G                                                       | 3 transfections (41) | Positive, $\leq$ ~1%, no spread                |
| C-5A_16m                       | I348M/T386I/L777S/S877P/R932G/K1303R/F1469L/V1555L/V1668A/A1677S/K1696R/I1720F/L1795M/S2209I/S2223P/D2987G                         | 4 transfections (35) | Positive, $\leq$ ~1%, no spread                |
| C-5A_13m                       | I348M/T386I/L777S/S877P/R932G/K1303R/F1469L/V1555L/V1668A/A1677S/K1696R/I1720F/L1795M                                              | 3 transfections (42) | Positive, $\leq$ ~1%, no spread                |
| C-5A_10m                       | K1303R/F1469L/V1555L/V1668A/A1677S/K1696R/I1720F/L1795M/S2209I/S2223P                                                              | 3 transfections (28) | Positive, $\leq$ ~1%, no spread                |
| C-5A_11m                       | I355M/N416S/I831V/L881F/K1303R/F1469L/V1555L/A1677S/K1696R/I1720F/L1795M                                                           | 3 transfections (28) |                                                |
| C-5A_15m                       | F349S/I355M/N416S/V627A/I746M/I831V/L881F/T1285A/K1303R/F1469L/V1555L/A1677S/K1696R/I1720F/L1795M (C-5A_15m in the text)           | 2 transfections (14) | Positive, peak at day 13                       |
| C-5A_18m                       | I355M/N416S/I831V/L881F/T1285A/K1303R/F1469L/V1555L/A1677S/K1696R/I1720F/L1795M/F2358C/D2388A/E2392G/D2423G (C-5A_18m in the text) | 3 transfections (14) | Positive, peak at day 9                        |
| <b>5'UTR-NS5A</b>              |                                                                                                                                    |                      |                                                |
| 5-5A_WT                        | None                                                                                                                               | 3 transfections (21) | Negative                                       |
| 5-5A_LS                        | F1469L/A1677S (LS mutations)                                                                                                       | 3 transfections (21) | Negative                                       |
| 5-5A_7m                        | K1303R/F1469L/V1555L/A1677S/K1696R/I1720F/L1795M                                                                                   | 3 transfections (35) | ~1% in the first week, no spread               |
| 5-5A_16m                       | I348M/T386I/L777S/S877P/R932G/K1303R/F1469L/V1555L/V1668A/A1677S/K1696R/I1720F/L1795M/S2209I/S2223P/D2987G                         | 3 transfections (42) | ~1% for 2 weeks, no spread                     |
| <b>CH6a-HK6a-JFH1 chimeras</b> |                                                                                                                                    |                      |                                                |
| C-NS3_3m*                      | K1303R/F1469L/V1555L                                                                                                               | 3 transfections (35) | ~1% in the first week, no spread               |
| C-NS2#                         | None (refers to C-NS2 in the text)                                                                                                 | 1 transfection (13)  | 1-5% in the first week, peak at day 25         |
| 5'UTR-NS2/NS4A-5A\$            | None                                                                                                                               | 3 transfections (41) | $\leq$ 1% for 2 weeks, no spread               |

Mutations containing in different genome organizations were indicated.

\*, the remaining genome sequences are JFH1(5'UTR), JFH1(NS4A-3'UTR, with EGFP in NS5A).

#, the remaining genome sequences are J6(5'UTR), JFH1(NS3-3'UTR, with EGFP in NS5A).

\$, the remaining genome sequences are JFH1(NS3, NS5B-3'UTR).

Supplementary Figure 1, part I

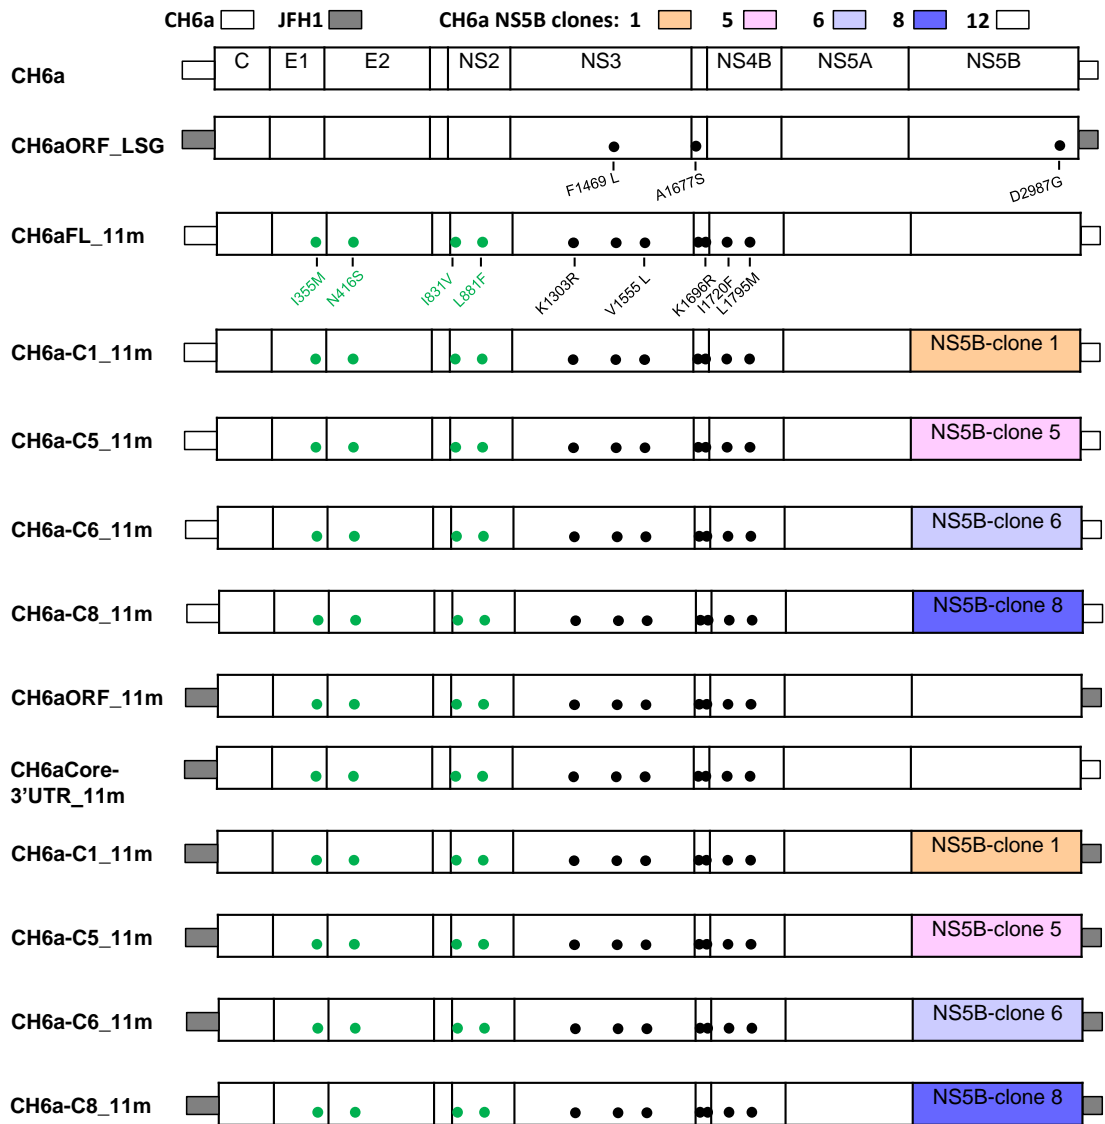

**Supplementary Figure 1, part II**

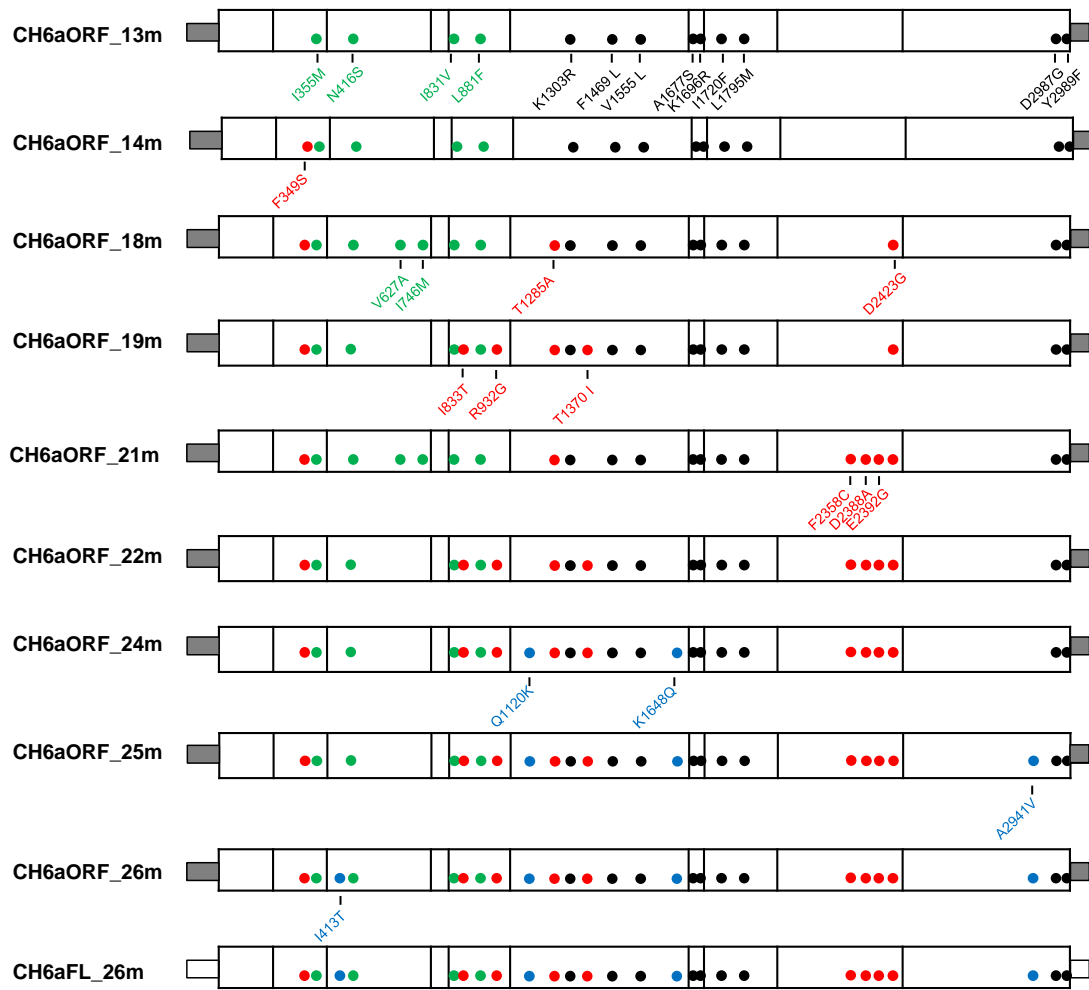

**Supplementary Figure 1. CH6a ORF or full-length genomes with mutations tested in this study.** Schematic diagrams of CH6a ORF recombinant with 5'UTR and 3'UTR from JFH1 or full-length genomes with NS5B sequences derived from different clones of PCR products tested in this study. Combinations of mutations engineered into the genomes were indicated. Mutations were highlighted in color, in which mutations identified previously were in black color, newly identified from the Core-NS2 recombinant were in green color (see Table 1), from the passaged C-5A\_11m viruses were red color (Table 2), and from CH6aORF\_22 were in blue color (Table 3).
